# Supplementary material for: One-pot synthesis of YF3@silica core/shell nanoparticles
Source: Royal Society of Chemistry journal article supplement (doi:10.1039/b516171a), 2006-01-01
Supplement: b516171a.pdf [file b516171a.pdf]

## **Supplementary Materials**

### **One-pot Synthesis of $\text{YF}_3$ @silica core/shell-nanoparticles**

**Masih Darbandi, Thomas Nann**

Freiburg Materials Research Center, Stefan-Meier-Strasse 21, Albert-Ludwig University  
Freiburg, D-79104, Freiburg, Germany

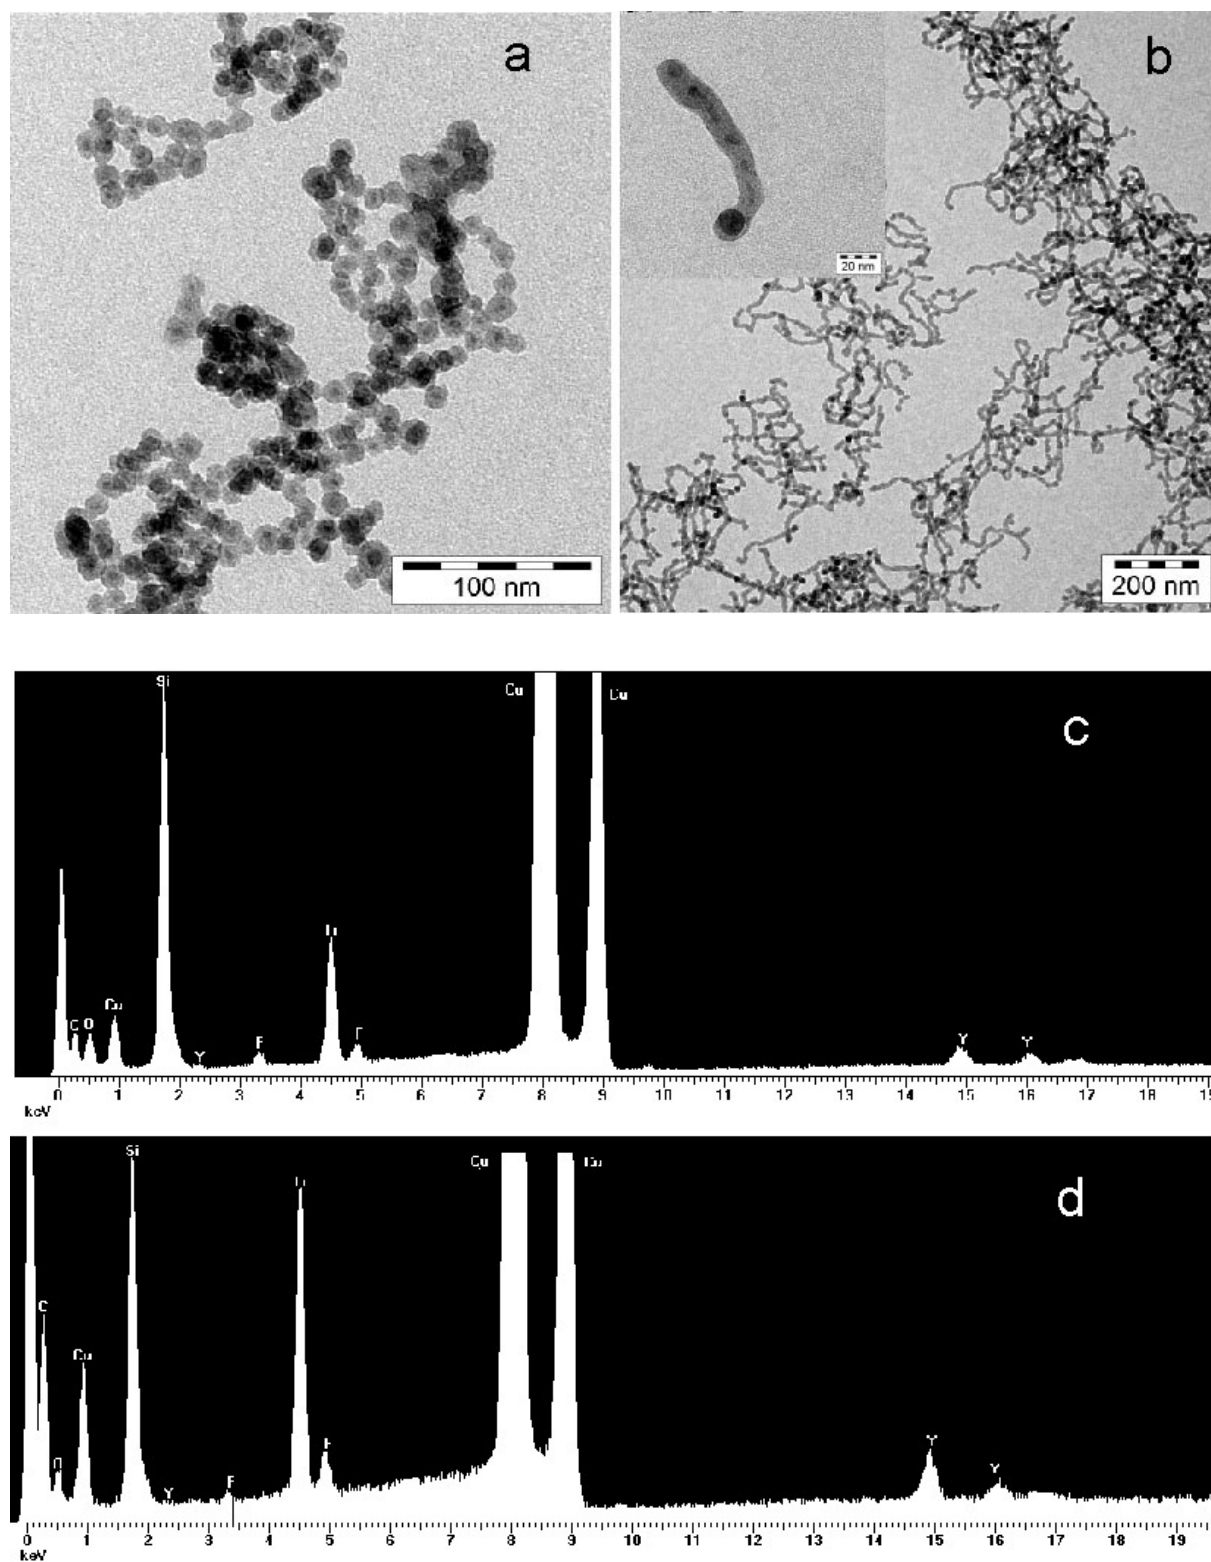

*Figure S1.* TEM image of YF<sub>3</sub>@SiO<sub>2</sub> nanoparticles (a) high concentration of surfactant (b) low concentration of surfactant. And EDAX spectrum of YF<sub>3</sub>@SiO<sub>2</sub> nanoparticles (c) high concentration of surfactant (d) low concentration of surfactant.

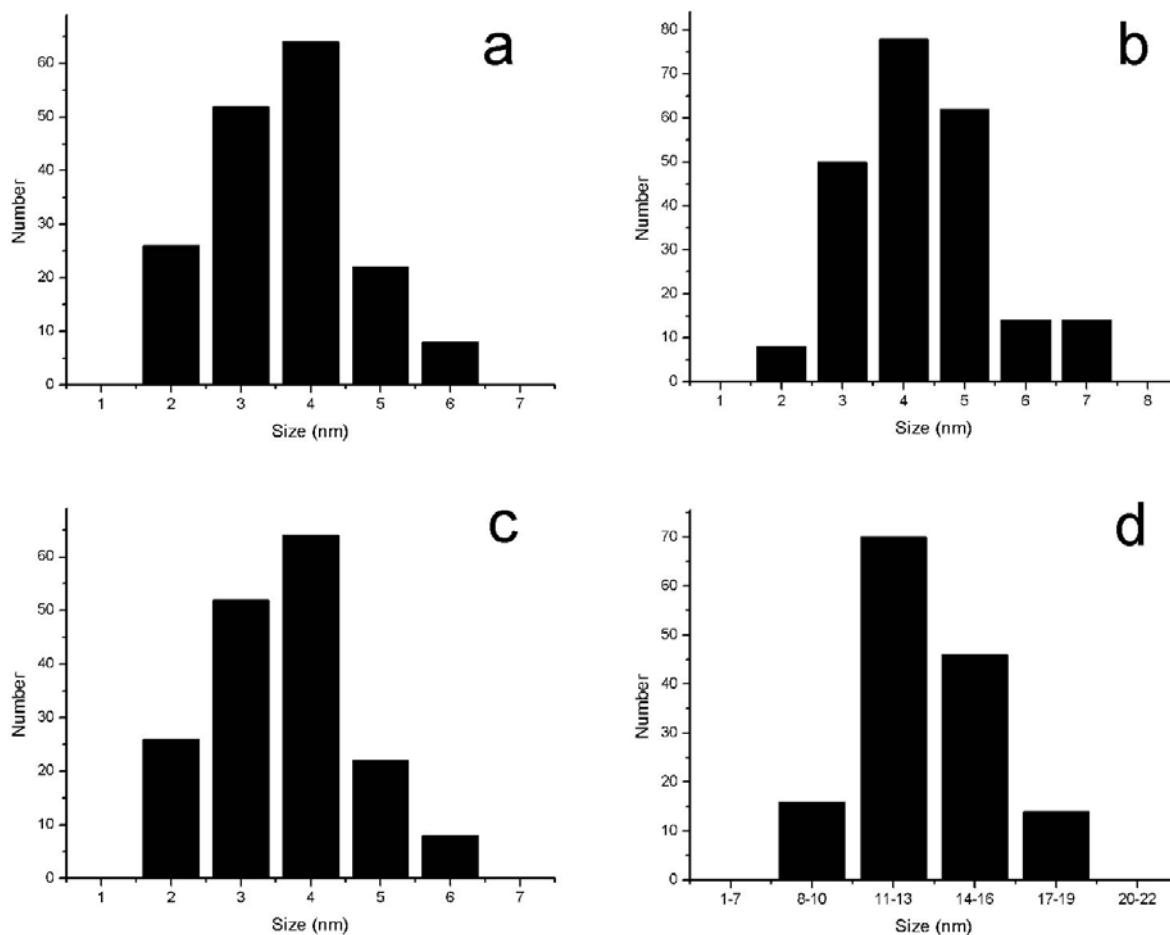

*Figure S2.* Size distribution histogram of YF<sub>3</sub>@SiO<sub>2</sub> nanoparticles (a) Core particle at high concentration of surfactant (b) Core particle at low concentration of surfactant. (c) Core/Shell particle at high concentration of surfactant (d) Core/Shell particle at low concentration of surfactant.
